# Supplementary material
Source: publisher figshare collection journal article supplement (https://acs.figshare.com/ndownloader/files/4276892)
Supplement: Supplementary file 1 [file 4276892]

## **Supplementary Figure and legends**

### **Inventory of items in Supplementary Information**

The supplementary information contains 2 figures and 12 tables.

**Supplementary Figure S1:** Network plot of the distribution of protein subcellular locations. (Related to Figure 4).

**Supplementary Figure S2:** Variation in staining intensity between the three cell lines. (Related to Figure 7).

**Supplementary Table 1:** Gene Ontology enrichment analysis of 635 proteins detected in the cytoplasm in U-2 OS. (Related to Figure 4).

**Supplementary Table 2:** Gene Ontology enrichment analysis of 53 proteins detected in the endoplasmic reticulum in U-2 OS. (Related to Figure 4).

**Supplementary Table 3:** Gene Ontology enrichment analysis of 53 proteins detected in the Golgi apparatus in U-2 OS. (Related to Figure 4).

**Supplementary Table 4:** Gene Ontology enrichment analysis of 70 proteins detected in the nucleoli in U-2 OS. (Related to Figure 4).

**Supplementary Table 5:** Gene Ontology enrichment analysis of 596 proteins detected in the nucleus in U-2 OS. (Related to Figure 4).

**Supplementary Table 6:** Gene Ontology enrichment analysis of 56 proteins detected in the plasma membrane in U-2 OS. (Related to Figure 4).

**Supplementary Table 7:** Gene Ontology enrichment analysis of 107 proteins detected in the vesicles in U-2 OS. (Related to Figure 4).

**Supplementary Table 8:** Gene Ontology (GO) enrichment analysis of 2,964 proteins expressed in all three cell lines. (Related to Figure 7).

**Supplementary Table 9:** Gene Ontology enrichment analysis of 67 proteins expressed exclusively in U-2 OS. (Related to Figure 7).

**Supplementary Table 10:** Gene Ontology enrichment analysis of 84 proteins expressed exclusively in A-431. (Related to Figure 7).

**Supplementary Table 11:** Gene Ontology enrichment analysis of 52 proteins expressed exclusively in U-251 MG. (Related to Figure 7).

**Supplementary Table 12:** Gene Ontology enrichment analysis of 457 proteins not detected in any of the three cell lines. (Related to Figure 7).

**Supplementary Figure S1. Network plot of the distribution of protein subcellular locations. Related to Figure 4.** Visualization of protein subcellular annotations for **A) U-251 MG** and **B) A431**. The total numbers of proteins detected are 3,280 for U-251 MG and 3341 for A-431. Each protein is represented by a circle colored by the number of compartments it is localized in. Each subcellular compartment is represented by a grey box with a two-letter code (bottom legend).

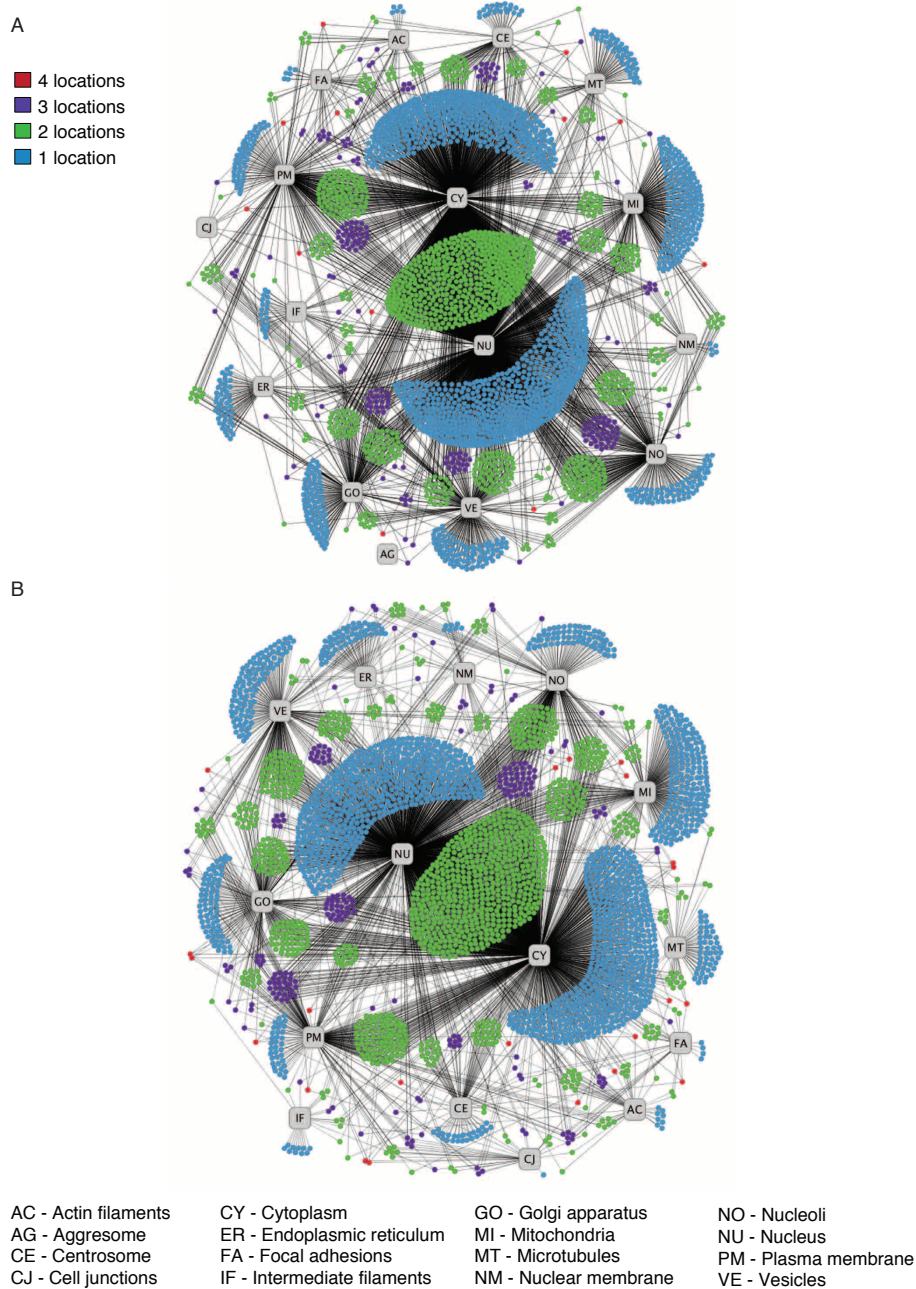

**Supplementary Figure S2. Variation in staining intensity between the three cell lines. Related to Figure 7.** Network plot of the distribution of the similarity of staining intensity in the three cell lines using 1,490 proteins detected in at least one of the three cell lines and localized in a single subcellular compartment. Each protein is represented by a circle with a color reflecting the similarity in terms of staining intensity for the cell lines in which it is detected (see legend). Staining intensities are categorized into four groups corresponding to negative, weak, moderate or strong based on microscope settings.

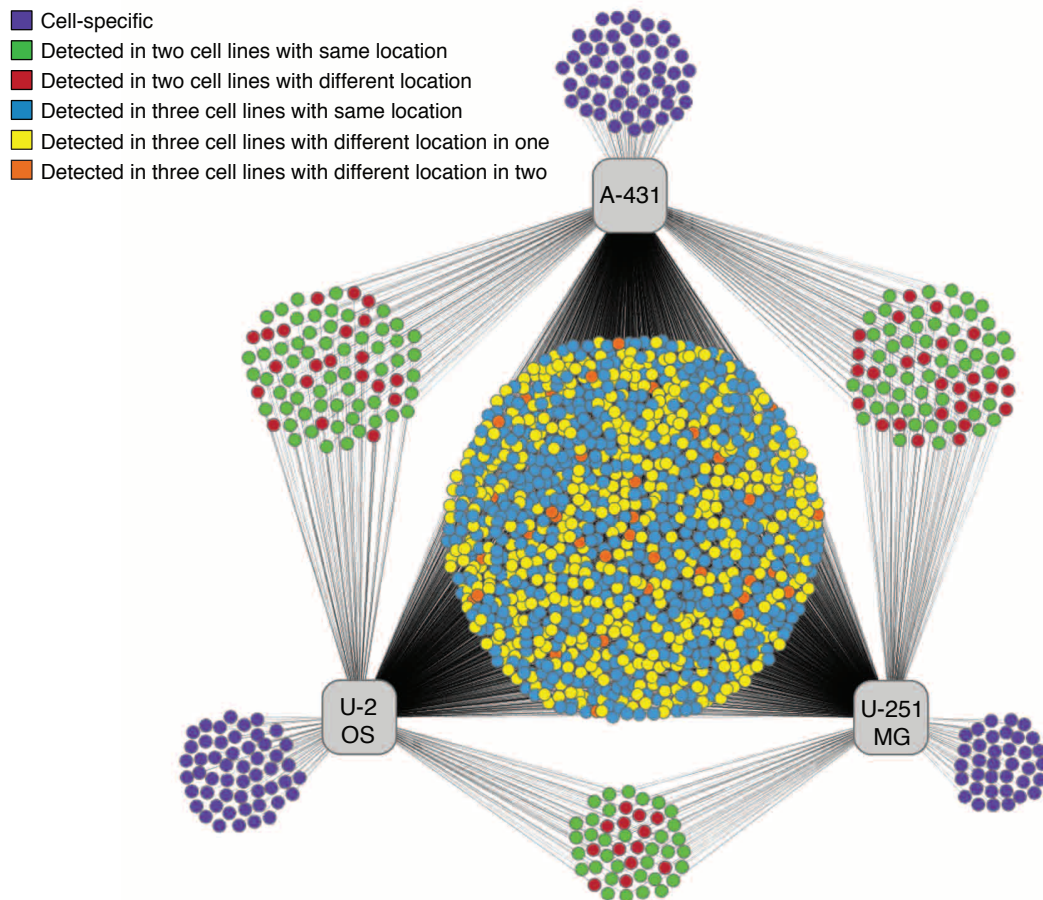

## Supplementary Tables and legends

**Supplementary Table 1. Gene Ontology (GO) –based enrichment analysis of 635 proteins detected in the cytoplasm in U-2 OS. Related to Figure 4.** The top results sorted by enrichment p-value are reported as well as the Benjamini-Hochberg multiple-testing correction and gene count for each GO term.

| GO Term                                          | GO Category        | Count | P-Value | Benjamini |
|--------------------------------------------------|--------------------|-------|---------|-----------|
| cytosol                                          | Cellular Component | 94    | 4.2E-8  | 1.6E-5    |
| cytoplasm                                        | Cellular Component | 368   | 4.4E-7  | 8.5E-5    |
| cytosolic part                                   | Cellular Component | 17    | 7.8E-6  | 1.0E-3    |
| translation                                      | Biological Process | 21    | 2.1E-4  | 4.2E-1    |
| cytosolic ribosome                               | Cellular Component | 8     | 8.0E-4  | 7.4E-2    |
| translational elongation                         | Biological Process | 9     | 1.5E-3  | 8.6E-1    |
| catalytic activity                               | Molecular Function | 242   | 3.8E-3  | 9.6E-1    |
| soluble fraction                                 | Cellular Component | 19    | 6.6E-3  | 4.0E-1    |
| ribosome                                         | Cellular Component | 14    | 6.8E-3  | 3.5E-1    |
| alcohol metabolic process                        | Biological Process | 28    | 6.8E-3  | 1.0E0     |
| ATP binding                                      | Molecular Function | 84    | 7.5E-3  | 9.6E-1    |
| purine nucleotide binding                        | Molecular Function | 97    | 8.6E-3  | 9.2E-1    |
| adenyl ribonucleotide binding                    | Molecular Function | 84    | 9.2E-3  | 8.6E-1    |
| purine nucleoside binding                        | Molecular Function | 88    | 9.6E-3  | 8.1E-1    |
| ribonucleotide binding                           | Molecular Function | 93    | 9.6E-3  | 7.5E-1    |
| purine ribonucleotide binding                    | Molecular Function | 93    | 9.6E-3  | 7.5E-1    |
| adenyl nucleotide binding                        | Molecular Function | 87    | 1.1E-2  | 7.6E-1    |
| response to oxidative stress                     | Biological Process | 15    | 1.2E-2  | 1.0E0     |
| nucleoside binding                               | Molecular Function | 88    | 1.2E-2  | 7.4E-1    |
| tRNA aminoacylation                              | Biological Process | 6     | 1.3E-2  | 1.0E0     |
| amino acid activation                            | Biological Process | 6     | 1.3E-2  | 1.0E0     |
| tRNA aminoacylation for protein translation      | Biological Process | 6     | 1.3E-2  | 1.0E0     |
| monosaccharide metabolic process                 | Biological Process | 18    | 1.7E-2  | 1.0E0     |
| heterocycle metabolic process                    | Biological Process | 21    | 1.7E-2  | 1.0E0     |
| structural constituent of ribosome               | Molecular Function | 9     | 1.8E-2  | 8.2E-1    |
| RNA binding                                      | Molecular Function | 37    | 1.8E-2  | 7.9E-1    |
| ribosomal subunit                                | Cellular Component | 8     | 1.9E-2  | 6.5E-1    |
| regulation of cellular protein metabolic process | Biological Process | 32    | 2.1E-2  | 1.0E0     |
| binding                                          | Molecular Function | 489   | 2.5E-2  | 8.6E-1    |
| microtubule-based movement                       | Biological Process | 10    | 2.5E-2  | 1.0E0     |

**Supplementary Table 2. GO-based enrichment analysis of 53 proteins detected in the endoplasmic reticulum in U-2 OS. Related to Figure 4.** The top results sorted by enrichment p-value are reported as well as the Benjamini-Hochberg multiple-testing correction and gene count for each GO term.

| GO Term                                        | GO Category        | Count | P-Value | Benjamini |
|------------------------------------------------|--------------------|-------|---------|-----------|
| endoplasmic reticulum                          | Cellular Component | 37    | 3.1E-29 | 3.5E-27   |
| endoplasmic reticulum part                     | Cellular Component | 21    | 1.2E-19 | 7.0E-18   |
| endoplasmic reticulum membrane                 | Cellular Component | 14    | 3.7E-12 | 1.4E-10   |
| nuclear envelope-endoplasmic reticulum network | Cellular Component | 14    | 8.3E-12 | 2.4E-10   |
| endomembrane system                            | Cellular Component | 18    | 2.4E-9  | 5.4E-8    |
| cytoplasmic part                               | Cellular Component | 41    | 5.7E-9  | 1.1E-7    |
| organelle membrane                             | Cellular Component | 19    | 3.2E-8  | 5.2E-7    |
| endoplasmic reticulum lumen                    | Cellular Component | 8     | 2.0E-7  | 2.9E-6    |
| membrane part                                  | Cellular Component | 41    | 7.6E-7  | 9.7E-6    |
| integral to membrane                           | Cellular Component | 36    | 1.1E-6  | 1.2E-5    |
| membrane                                       | Cellular Component | 43    | 2.2E-6  | 2.3E-5    |
| intrinsic to membrane                          | Cellular Component | 36    | 2.5E-6  | 2.4E-5    |
| protein folding                                | Biological Process | 8     | 6.4E-6  | 3.5E-3    |
| vesicular fraction                             | Cellular Component | 9     | 7.6E-6  | 6.7E-5    |
| unfolded protein binding                       | Molecular Function | 7     | 8.9E-6  | 1.6E-3    |
| insoluble fraction                             | Cellular Component | 14    | 3.3E-5  | 2.7E-4    |
| cell fraction                                  | Cellular Component | 15    | 5.7E-5  | 4.3E-4    |
| microsome                                      | Cellular Component | 8     | 6.6E-5  | 4.7E-4    |
| cholesterol metabolic process                  | Biological Process | 5     | 9.1E-5  | 2.5E-2    |
| membrane fraction                              | Cellular Component | 13    | 1.2E-4  | 7.8E-4    |
| sterol metabolic process                       | Biological Process | 5     | 1.7E-4  | 3.1E-2    |
| ER-associated protein catabolic process        | Biological Process | 4     | 2.1E-4  | 2.8E-2    |
| cholesterol biosynthetic process               | Biological Process | 4     | 2.1E-4  | 2.8E-2    |
| integral to endoplasmic reticulum membrane     | Cellular Component | 4     | 3.4E-4  | 2.2E-3    |

**Supplementary Table 3. GO-based enrichment analysis of 53 proteins detected in the Golgi apparatus in U-2 OS. Related to Figure 4.** The top results sorted by enrichment p-value are reported as well as the Benjamini-Hochberg multiple-testing correction and gene count for each GO term.

| <b>GO Term</b>                                      | <b>GO Category</b> | <b>Count</b> | <b>P-Value</b> | <b>Benjamini</b> |
|-----------------------------------------------------|--------------------|--------------|----------------|------------------|
| Golgi apparatus                                     | Cellular Component | 19           | 9.9E-9         | 1.6E-6           |
| Golgi apparatus part                                | Cellular Component | 9            | 3.2E-6         | 2.6E-4           |
| Golgi stack                                         | Cellular Component | 5            | 2.8E-5         | 1.5E-3           |
| organelle subcompartment                            | Cellular Component | 3            | 1.8E-3         | 6.8E-2           |
| Golgi cisterna                                      | Cellular Component | 3            | 1.8E-3         | 6.8E-2           |
| Golgi membrane                                      | Cellular Component | 5            | 2.5E-3         | 7.8E-2           |
| protein homodimerization activity                   | Molecular Function | 6            | 5.3E-3         | 6.1E-1           |
| intrinsic to membrane                               | Cellular Component | 27           | 5.9E-3         | 1.5E-1           |
| membrane part                                       | Cellular Component | 31           | 6.1E-3         | 1.3E-1           |
| integral to membrane                                | Cellular Component | 26           | 8.5E-3         | 1.6E-1           |
| membrane                                            | Cellular Component | 33           | 1.1E-2         | 1.8E-1           |
| cytoplasmic part                                    | Cellular Component | 27           | 1.4E-2         | 2.0E-1           |
| peptide binding                                     | Molecular Function | 4            | 1.4E-2         | 7.1E-1           |
| ER-Golgi intermediate compartment                   | Cellular Component | 3            | 1.5E-2         | 2.0E-1           |
| cytoplasmic membrane-bounded vesicle                | Cellular Component | 7            | 1.6E-2         | 1.9E-1           |
| identical protein binding                           | Molecular Function | 7            | 1.8E-2         | 6.5E-1           |
| membrane-bounded vesicle                            | Cellular Component | 7            | 1.8E-2         | 2.0E-1           |
| Golgi medial cisterna                               | Cellular Component | 2            | 2.7E-2         | 2.7E-1           |
| Golgi trans cisterna                                | Cellular Component | 2            | 2.7E-2         | 2.7E-1           |
| protein dimerization activity                       | Molecular Function | 6            | 3.3E-2         | 7.7E-1           |
| cytoplasmic vesicle                                 | Cellular Component | 7            | 3.8E-2         | 3.4E-1           |
| vesicle                                             | Cellular Component | 7            | 4.4E-2         | 3.6E-1           |
| peptide receptor activity                           | Molecular Function | 3            | 4.6E-2         | 8.1E-1           |
| peptide receptor activity, G-protein coupled        | Molecular Function | 3            | 4.6E-2         | 8.1E-1           |
| glycosylation                                       | Biological Process | 3            | 5.7E-2         | 1.0E0            |
| protein amino acid glycosylation                    | Biological Process | 3            | 5.7E-2         | 1.0E0            |
| biopolymer glycosylation                            | Biological Process | 3            | 5.7E-2         | 1.0E0            |
| peptide hormone binding                             | Molecular Function | 2            | 6.5E-2         | 8.6E-1           |
| peptidase activity, acting on L-amino acid peptides | Molecular Function | 5            | 6.5E-2         | 8.2E-1           |
| cis-Golgi network                                   | Cellular Component | 2            | 6.6E-2         | 4.7E-1           |

**Supplementary Table 4. GO-based enrichment analysis of 70 proteins detected in the nucleoli in U-2 OS. Related to Figure 4.** The top results sorted by enrichment p-value are reported as well as the Benjamini-Hochberg multiple-testing correction and gene count for each GO term.

| <b>GO Term</b>                                       | <b>GO Category</b> | <b>Count</b> | <b>P-Value</b> | <b>Benjamini</b> |
|------------------------------------------------------|--------------------|--------------|----------------|------------------|
| nucleolus                                            | Cellular Component | 17           | 3.4E-4         | 4.9E-2           |
| ribosome biogenesis                                  | Biological Process | 4            | 2.5E-3         | 8.9E-1           |
| intracellular non-membrane-bounded organelle         | Cellular Component | 24           | 5.8E-3         | 3.5E-1           |
| non-membrane-bounded organelle                       | Cellular Component | 24           | 5.8E-3         | 3.5E-1           |
| intracellular organelle lumen                        | Cellular Component | 20           | 6.5E-3         | 2.7E-1           |
| cellular amino acid derivative metabolic process     | Biological Process | 5            | 7.7E-3         | 9.7E-1           |
| organelle lumen                                      | Cellular Component | 20           | 8.0E-3         | 2.6E-1           |
| ribonucleoprotein complex biogenesis                 | Biological Process | 4            | 8.6E-3         | 9.2E-1           |
| membrane-enclosed lumen                              | Cellular Component | 20           | 9.1E-3         | 2.3E-1           |
| nuclear lumen                                        | Cellular Component | 17           | 1.2E-2         | 2.6E-1           |
| ncRNA processing                                     | Biological Process | 4            | 1.4E-2         | 9.6E-1           |
| neuromuscular process                                | Biological Process | 3            | 1.9E-2         | 9.7E-1           |
| rRNA processing                                      | Biological Process | 3            | 1.9E-2         | 9.7E-1           |
| nuclear part                                         | Cellular Component | 18           | 2.0E-2         | 3.4E-1           |
| rRNA metabolic process                               | Biological Process | 3            | 2.2E-2         | 9.6E-1           |
| ncRNA metabolic process                              | Biological Process | 4            | 3.0E-2         | 9.8E-1           |
| glycerolipid catabolic process                       | Biological Process | 2            | 3.3E-2         | 9.8E-1           |
| cellular catabolic process                           | Biological Process | 10           | 3.5E-2         | 9.7E-1           |
| preribosome, small subunit precursor                 | Cellular Component | 2            | 3.5E-2         | 4.8E-1           |
| response to organic nitrogen                         | Biological Process | 3            | 4.7E-2         | 9.9E-1           |
| post-embryonic morphogenesis                         | Biological Process | 2            | 4.9E-2         | 9.8E-1           |
| cellular lipid catabolic process                     | Biological Process | 3            | 5.9E-2         | 9.9E-1           |
| cellular amino acid and derivative metabolic process | Biological Process | 5            | 6.3E-2         | 9.9E-1           |
| cellular process                                     | Biological Process | 47           | 6.8E-2         | 9.9E-1           |
| preribosome                                          | Cellular Component | 2            | 6.9E-2         | 6.9E-1           |
| nucleotidyltransferase activity                      | Molecular Function | 3            | 8.2E-2         | 1.0E0            |
| catabolic process                                    | Biological Process | 10           | 9.3E-2         | 1.0E0            |
| locomotory behavior                                  | Biological Process | 4            | 9.6E-2         | 1.0E0            |
| neuromuscular process controlling balance            | Biological Process | 2            | 9.6E-2         | 9.9E-1           |

**Supplementary Table 5. GO-based enrichment analysis of 596 proteins detected in the nucleus in U-2 OS. Related to Figure 4.** The top results sorted by enrichment p-value are reported as well as the Benjamini-Hochberg multiple-testing correction and gene count for each GO term.

| GO Term                                                                             | GO Category        | Count | P-Value | Benjamini |
|-------------------------------------------------------------------------------------|--------------------|-------|---------|-----------|
| nucleolus                                                                           | Cellular Component | 134   | 1.9E-66 | 6.8E-64   |
| nuclear lumen                                                                       | Cellular Component | 181   | 2.4E-61 | 4.3E-59   |
| nuclear part                                                                        | Cellular Component | 192   | 1.1E-53 | 1.3E-51   |
| intracellular organelle lumen                                                       | Cellular Component | 187   | 7.3E-52 | 6.6E-50   |
| organelle lumen                                                                     | Cellular Component | 189   | 1.1E-51 | 7.6E-50   |
| membrane-enclosed lumen                                                             | Cellular Component | 189   | 2.2E-50 | 1.3E-48   |
| non-membrane-bounded organelle                                                      | Cellular Component | 195   | 1.4E-32 | 7.4E-31   |
| intracellular non-membrane-bounded organelle                                        | Cellular Component | 195   | 1.4E-32 | 7.4E-31   |
| nucleus                                                                             | Cellular Component | 294   | 2.5E-32 | 1.1E-30   |
| nucleobase, nucleoside, nucleotide and nucleic acid metabolic process               | Biological Process | 224   | 1.7E-27 | 4.0E-24   |
| DNA binding                                                                         | Molecular Function | 173   | 4.2E-26 | 2.8E-23   |
| cellular nitrogen compound metabolic process                                        | Biological Process | 229   | 5.4E-25 | 6.3E-22   |
| nitrogen compound metabolic process                                                 | Biological Process | 231   | 5.2E-24 | 4.0E-21   |
| nucleic acid binding                                                                | Molecular Function | 209   | 5.5E-24 | 1.9E-21   |
| regulation of gene expression                                                       | Biological Process | 191   | 2.9E-23 | 1.7E-20   |
| transcription regulator activity                                                    | Molecular Function | 127   | 5.4E-23 | 1.2E-20   |
| regulation of transcription                                                         | Biological Process | 177   | 5.0E-22 | 2.4E-19   |
| regulation of nucleobase, nucleoside, nucleotide and nucleic acid metabolic process | Biological Process | 186   | 6.6E-22 | 2.6E-19   |
| organelle part                                                                      | Cellular Component | 238   | 1.2E-21 | 4.7E-20   |
| intracellular organelle part                                                        | Cellular Component | 237   | 1.2E-21 | 4.3E-20   |
| gene expression                                                                     | Biological Process | 193   | 1.5E-21 | 5.1E-19   |
| regulation of nitrogen compound metabolic process                                   | Biological Process | 186   | 1.8E-21 | 5.3E-19   |
| regulation of macromolecule biosynthetic process                                    | Biological Process | 185   | 3.3E-21 | 8.5E-19   |
| regulation of macromolecule metabolic process                                       | Biological Process | 203   | 3.4E-21 | 8.0E-19   |
| transcription                                                                       | Biological Process | 152   | 5.8E-21 | 1.2E-18   |
| regulation of primary metabolic process                                             | Biological Process | 202   | 2.8E-20 | 5.4E-18   |
| regulation of biosynthetic process                                                  | Biological Process | 188   | 4.3E-20 | 7.8E-18   |
| regulation of cellular biosynthetic process                                         | Biological Process | 187   | 5.2E-20 | 8.7E-18   |
| cellular macromolecule metabolic process                                            | Biological Process | 272   | 6.6E-19 | 1.0E-16   |
| regulation of cellular metabolic process                                            | Biological Process | 205   | 9.5E-19 | 1.4E-16   |



**Supplementary Table 6. GO-based enrichment analysis of 56 proteins detected in the plasma membrane in U-2 OS. Related to Figure 4.** The top results sorted by enrichment p-value are reported as well as the Benjamini-Hochberg multiple-testing correction and gene count for each GO term.

| GO Term                                                | GO Category        | Count | P-Value | Benjamini |
|--------------------------------------------------------|--------------------|-------|---------|-----------|
| plasma membrane                                        | Cellular Component | 32    | 1.7E-8  | 2.3E-6    |
| plasma membrane part                                   | Cellular Component | 25    | 7.0E-8  | 4.7E-6    |
| membrane part                                          | Cellular Component | 39    | 3.5E-7  | 1.5E-5    |
| membrane                                               | Cellular Component | 41    | 6.9E-7  | 2.3E-5    |
| apical part of cell                                    | Cellular Component | 7     | 1.5E-4  | 3.9E-3    |
| cell junction                                          | Cellular Component | 10    | 2.2E-4  | 4.8E-3    |
| extrinsic to membrane                                  | Cellular Component | 9     | 3.7E-4  | 7.1E-3    |
| integral to plasma membrane                            | Cellular Component | 13    | 3.9E-4  | 6.6E-3    |
| intrinsic to plasma membrane                           | Cellular Component | 13    | 4.5E-4  | 6.6E-3    |
| cytoskeletal protein binding                           | Molecular Function | 9     | 7.2E-4  | 1.2E-1    |
| cell-cell junction                                     | Cellular Component | 6     | 7.3E-4  | 9.7E-3    |
| cortical actin cytoskeleton organization               | Biological Process | 3     | 2.0E-3  | 6.3E-1    |
| actin binding                                          | Molecular Function | 7     | 2.0E-3  | 1.7E-1    |
| intrinsic to membrane                                  | Cellular Component | 28    | 2.5E-3  | 3.0E-2    |
| cortical cytoskeleton organization                     | Biological Process | 3     | 2.9E-3  | 5.2E-1    |
| transmembrane transport                                | Biological Process | 7     | 5.7E-3  | 6.2E-1    |
| monocarboxylic acid transmembrane transporter activity | Molecular Function | 3     | 7.9E-3  | 3.9E-1    |
| integral to membrane                                   | Cellular Component | 26    | 8.5E-3  | 9.1E-2    |
| localization                                           | Biological Process | 18    | 1.7E-2  | 8.8E-1    |
| anchoring junction                                     | Cellular Component | 5     | 2.3E-2  | 2.1E-1    |
| apical plasma membrane                                 | Cellular Component | 4     | 2.3E-2  | 2.0E-1    |
| basolateral plasma membrane                            | Cellular Component | 5     | 2.9E-2  | 2.3E-1    |
| cell development                                       | Biological Process | 7     | 3.0E-2  | 9.5E-1    |
| cell-cell adhesion                                     | Biological Process | 5     | 3.6E-2  | 9.5E-1    |
| membrane fraction                                      | Cellular Component | 8     | 3.9E-2  | 2.8E-1    |
| organic acid transmembrane transporter activity        | Molecular Function | 3     | 3.9E-2  | 8.4E-1    |
| carboxylic acid transmembrane transporter activity     | Molecular Function | 3     | 3.9E-2  | 8.4E-1    |
| transmembrane transporter activity                     | Molecular Function | 7     | 4.1E-2  | 7.9E-1    |
| cell fraction                                          | Cellular Component | 9     | 4.3E-2  | 2.9E-1    |
| insoluble fraction                                     | Cellular Component | 8     | 4.4E-2  | 2.9E-1    |

**Supplementary Table 7. GO-based enrichment analysis of 107 proteins detected in the vesicles in U-2 OS. Related to Figure 4.** The top results sorted by enrichment p-value are reported as well as the Benjamini-Hochberg multiple-testing correction and gene count for each GO term.

| GO Term                                                 | GO Category        | Count | P-Value | Benjamini |
|---------------------------------------------------------|--------------------|-------|---------|-----------|
| neuron differentiation                                  | Biological Process | 10    | 1.3E-3  | 7.7E-1    |
| neuron projection development                           | Biological Process | 8     | 2.1E-3  | 7.0E-1    |
| generation of neurons                                   | Biological Process | 11    | 3.0E-3  | 6.9E-1    |
| neuron projection morphogenesis                         | Biological Process | 7     | 3.4E-3  | 6.3E-1    |
| cell projection organization                            | Biological Process | 9     | 5.3E-3  | 7.1E-1    |
| cell soma                                               | Cellular Component | 6     | 5.5E-3  | 6.9E-1    |
| neuron development                                      | Biological Process | 8     | 5.9E-3  | 6.8E-1    |
| neurogenesis                                            | Biological Process | 11    | 6.0E-3  | 6.3E-1    |
| cell projection morphogenesis                           | Biological Process | 7     | 6.0E-3  | 5.9E-1    |
| extracellular region                                    | Cellular Component | 21    | 6.6E-3  | 5.0E-1    |
| cell morphogenesis involved in differentiation          | Biological Process | 7     | 7.0E-3  | 6.0E-1    |
| cell part morphogenesis                                 | Biological Process | 7     | 7.6E-3  | 5.9E-1    |
| nucleotide metabolic process                            | Biological Process | 7     | 8.7E-3  | 6.0E-1    |
| nucleoside phosphate metabolic process                  | Biological Process | 7     | 8.7E-3  | 6.0E-1    |
| axon                                                    | Cellular Component | 6     | 9.6E-3  | 4.9E-1    |
| transport vesicle                                       | Cellular Component | 4     | 9.9E-3  | 4.0E-1    |
| cytoplasmic vesicle                                     | Cellular Component | 12    | 1.0E-2  | 3.5E-1    |
| membrane part                                           | Cellular Component | 54    | 1.1E-2  | 3.1E-1    |
| nucleobase, nucleoside and nucleotide metabolic process | Biological Process | 7     | 1.1E-2  | 6.5E-1    |
| intrinsic to membrane                                   | Cellular Component | 46    | 1.1E-2  | 2.8E-1    |
| ribonucleotide metabolic process                        | Biological Process | 5     | 1.1E-2  | 6.4E-1    |
| axonogenesis                                            | Biological Process | 6     | 1.2E-2  | 6.3E-1    |
| cell morphogenesis                                      | Biological Process | 8     | 1.2E-2  | 6.1E-1    |
| pyrimidine nucleoside metabolic process                 | Biological Process | 3     | 1.3E-2  | 6.2E-1    |
| vesicle                                                 | Cellular Component | 12    | 1.3E-2  | 2.9E-1    |
| cell morphogenesis involved in neuron differentiation   | Biological Process | 6     | 1.5E-2  | 6.4E-1    |
| heterocycle metabolic process                           | Biological Process | 7     | 1.5E-2  | 6.3E-1    |
| neuron projection                                       | Cellular Component | 8     | 1.6E-2  | 3.1E-1    |
| cellular component morphogenesis                        | Biological Process | 8     | 1.9E-2  | 6.9E-1    |
| cell projection                                         | Cellular Component | 12    | 1.9E-2  | 3.4E-1    |

**Supplementary Table 8. GO-based enrichment analysis of 2,964 proteins expressed in all three cell lines. Related to Figure 7.** The top results sorted by enrichment p-value are reported as well as the Benjamini-Hochberg multiple-testing correction and gene count for each GO term.

| GO Term                                                               | GO Category        | Count | P-Value | Benjamini |
|-----------------------------------------------------------------------|--------------------|-------|---------|-----------|
| intracellular organelle lumen                                         | Cellular Component | 537   | 6.5E-24 | 4.7E-21   |
| nucleus                                                               | Cellular Component | 998   | 2.4E-23 | 8.7E-21   |
| organelle lumen                                                       | Cellular Component | 543   | 4.2E-22 | 1.0E-19   |
| nuclear lumen                                                         | Cellular Component | 452   | 4.7E-22 | 8.5E-20   |
| membrane-enclosed lumen                                               | Cellular Component | 548   | 8.1E-22 | 1.2E-19   |
| nuclear part                                                          | Cellular Component | 507   | 8.9E-20 | 1.1E-17   |
| intracellular non-membrane-bounded organelle                          | Cellular Component | 670   | 1.2E-19 | 1.2E-17   |
| non-membrane-bounded organelle                                        | Cellular Component | 670   | 1.2E-19 | 1.2E-17   |
| intracellular                                                         | Cellular Component | 1980  | 1.1E-17 | 9.9E-16   |
| nucleic acid binding                                                  | Molecular Function | 598   | 1.3E-17 | 2.3E-14   |
| nucleolus                                                             | Cellular Component | 325   | 3.8E-17 | 3.0E-15   |
| membrane-bounded organelle                                            | Cellular Component | 1522  | 1.6E-16 | 8.1E-15   |
| intracellular membrane-bounded organelle                              | Cellular Component | 1519  | 2.0E-16 | 1.5E-14   |
| intracellular organelle                                               | Cellular Component | 1663  | 5.9E-16 | 3.4E-14   |
| organelle                                                             | Cellular Component | 1663  | 8.5E-16 | 5.0E-14   |
| intracellular part                                                    | Cellular Component | 1933  | 9.5E-16 | 5.2E-14   |
| organelle part                                                        | Cellular Component | 909   | 1.1E-15 | 5.4E-14   |
| intracellular organelle part                                          | Cellular Component | 903   | 1.8E-15 | 8.1E-14   |
| nucleobase, nucleoside, nucleotide and nucleic acid metabolic process | Biological Process | 630   | 1.8E-14 | 8.8E-11   |
| gene expression                                                       | Biological Process | 541   | 2.7E-13 | 6.4E-10   |
| DNA binding                                                           | Molecular Function | 439   | 3.8E-13 | 3.2E-10   |
| cellular nitrogen compound metabolic process                          | Biological Process | 679   | 1.3E-12 | 2.1E-9    |
| cellular macromolecule metabolic process                              | Biological Process | 990   | 1.8E-12 | 2.2E-9    |
| nitrogen compound metabolic process                                   | Biological Process | 699   | 2.6E-12 | 2.5E-9    |
| cellular macromolecule biosynthetic process                           | Biological Process | 531   | 2.8E-12 | 2.2E-9    |
| regulation of transcription                                           | Biological Process | 493   | 3.1E-12 | 2.1E-9    |
| macromolecule biosynthetic process                                    | Biological Process | 534   | 1.1E-11 | 6.4E-9    |
| regulation of gene expression                                         | Biological Process | 544   | 1.2E-11 | 6.7E-9    |
| regulation of macromolecule biosynthetic process                      | Biological Process | 537   | 2.2E-11 | 1.0E-8    |
| nucleoplasm                                                           | Cellular Component | 202   | 4.1E-11 | 1.8E-9    |

**Supplementary Table 9. GO-based enrichment analysis of 67 proteins expressed exclusively in U-2 OS. Related to Figure 7.** The top results sorted by enrichment p-value are reported as well as the Benjamini-Hochberg multiple-testing correction and gene count for each GO term.

| GO Term                                                        | GO Category        | Count | P-Value | Benjamini |
|----------------------------------------------------------------|--------------------|-------|---------|-----------|
| carbohydrate binding                                           | Molecular Function | 7     | 3.9E-3  | 6.3E-1    |
| intrinsic to plasma membrane                                   | Cellular Component | 12    | 7.1E-3  | 6.9E-1    |
| transmembrane receptor activity                                | Molecular Function | 10    | 7.7E-3  | 6.3E-1    |
| plasma membrane part                                           | Cellular Component | 18    | 9.2E-3  | 5.3E-1    |
| phosphoric diester hydrolase activity                          | Molecular Function | 4     | 1.1E-2  | 6.1E-1    |
| system development                                             | Biological Process | 17    | 1.3E-2  | 1.0E0     |
| sugar binding                                                  | Molecular Function | 5     | 1.5E-2  | 6.1E-1    |
| regulation of localization                                     | Biological Process | 8     | 1.5E-2  | 1.0E0     |
| integral to plasma membrane                                    | Cellular Component | 11    | 1.8E-2  | 6.3E-1    |
| response to chemical stimulus                                  | Biological Process | 12    | 1.8E-2  | 9.9E-1    |
| response to hormone stimulus                                   | Biological Process | 6     | 2.0E-2  | 9.8E-1    |
| membrane part                                                  | Cellular Component | 34    | 2.2E-2  | 5.9E-1    |
| growth factor binding                                          | Molecular Function | 4     | 2.6E-2  | 7.4E-1    |
| PDZ domain binding                                             | Molecular Function | 3     | 2.7E-2  | 6.9E-1    |
| anatomical structure development                               | Biological Process | 17    | 2.9E-2  | 9.9E-1    |
| response to endogenous stimulus                                | Biological Process | 6     | 2.9E-2  | 9.8E-1    |
| receptor activity                                              | Molecular Function | 12    | 3.0E-2  | 6.8E-1    |
| cell surface receptor linked signal transduction               | Biological Process | 11    | 3.1E-2  | 9.7E-1    |
| drug binding                                                   | Molecular Function | 3     | 3.8E-2  | 7.1E-1    |
| regulation of cell migration                                   | Biological Process | 4     | 4.0E-2  | 9.9E-1    |
| regulation of cellular component organization                  | Biological Process | 6     | 4.0E-2  | 9.8E-1    |
| intrinsic to membrane                                          | Cellular Component | 28    | 4.5E-2  | 7.8E-1    |
| regulation of membrane protein ectodomain proteolysis          | Biological Process | 2     | 4.6E-2  | 9.8E-1    |
| positive regulation of membrane protein ectodomain proteolysis | Biological Process | 2     | 4.6E-2  | 9.8E-1    |
| asymmetric synapse                                             | Cellular Component | 2     | 4.8E-2  | 7.4E-1    |
| regulation of cell motion                                      | Biological Process | 4     | 5.1E-2  | 9.8E-1    |
| integral to membrane                                           | Cellular Component | 27    | 5.5E-2  | 7.3E-1    |
| regulation of locomotion                                       | Biological Process | 4     | 5.9E-2  | 9.8E-1    |
| drug transport                                                 | Biological Process | 2     | 6.1E-2  | 9.8E-1    |
| postsynaptic membrane                                          | Cellular Component | 3     | 6.1E-2  | 7.3E-1    |

**Supplementary Table 10. GO-based enrichment analysis of 84 proteins expressed exclusively in A-431. Related to Figure 7.** The top results sorted by enrichment p-value are reported as well as the Benjamini-Hochberg multiple-testing correction and gene count for each GO term.

| <b>GO Term</b>                           | <b>GO Category</b> | <b>Count</b> | <b>P-Value</b> | <b>Benjamini</b> |
|------------------------------------------|--------------------|--------------|----------------|------------------|
| molecular transducer activity            | Molecular Function | 21           | 2.3E-3         | 4.8E-1           |
| signal transducer activity               | Molecular Function | 21           | 2.3E-3         | 4.8E-1           |
| receptor activity                        | Molecular Function | 15           | 1.8E-2         | 9.2E-1           |
| regulation of biological process         | Biological Process | 44           | 5.3E-2         | 1.0E0            |
| biological regulation                    | Biological Process | 46           | 5.5E-2         | 1.0E0            |
| regulation of body fluid levels          | Biological Process | 4            | 6.0E-2         | 1.0E0            |
| regulation of cellular process           | Biological Process | 42           | 6.4E-2         | 1.0E0            |
| microsome                                | Cellular Component | 5            | 7.3E-2         | 1.0E0            |
| extracellular region                     | Cellular Component | 15           | 7.5E-2         | 1.0E0            |
| vesicular fraction                       | Cellular Component | 5            | 7.6E-2         | 9.8E-1           |
| transmembrane receptor activity          | Molecular Function | 9            | 8.4E-2         | 1.0E0            |
| procollagen-proline dioxygenase activity | Molecular Function | 2            | 8.7E-2         | 1.0E0            |
| peptidyl-proline dioxygenase activity    | Molecular Function | 2            | 8.7E-2         | 1.0E0            |
| response to wounding                     | Biological Process | 7            | 9.3E-2         | 1.0E0            |
| oxidoreductase activity                  | Molecular Function | 8            | 9.9E-2         | 1.0E0            |

**Supplementary Table 11. GO-based enrichment analysis of 52 proteins expressed exclusively in U-251 MG. Related to Figure 7.** The top results sorted by enrichment p-value are reported as well as the Benjamini-Hochberg multiple-testing correction and gene count for each GO term.

| <b>GO Term</b>                                  | <b>GO Category</b> | <b>Count</b> | <b>P-Value</b> | <b>Benjamini</b> |
|-------------------------------------------------|--------------------|--------------|----------------|------------------|
| central nervous system development              | Biological Process | 6            | 1.8E-2         | 1.0E0            |
| positive regulation of Cdc42 GTPase activity    | Biological Process | 2            | 2.7E-2         | 1.0E0            |
| multicellular organismal process                | Biological Process | 20           | 3.6E-2         | 1.0E0            |
| multicellular organismal development            | Biological Process | 16           | 4.7E-2         | 1.0E0            |
| developmental process                           | Biological Process | 17           | 5.5E-2         | 1.0E0            |
| positive regulation of Ras GTPase activity      | Biological Process | 2            | 6.7E-2         | 1.0E0            |
| regulation of Cdc42 protein signal transduction | Biological Process | 2            | 6.7E-2         | 1.0E0            |
| regulation of Cdc42 GTPase activity             | Biological Process | 2            | 6.7E-2         | 1.0E0            |
| positive regulation of Rho GTPase activity      | Biological Process | 2            | 6.7E-2         | 1.0E0            |
| positive regulation of GTPase activity          | Biological Process | 2            | 6.7E-2         | 1.0E0            |
| kidney development                              | Biological Process | 3            | 7.1E-2         | 1.0E0            |
| sex differentiation                             | Biological Process | 3            | 7.5E-2         | 1.0E0            |
| urogenital system development                   | Biological Process | 3            | 8.3E-2         | 1.0E0            |
| nervous system development                      | Biological Process | 8            | 8.7E-2         | 1.0E0            |
| system development                              | Biological Process | 13           | 9.0E-2         | 1.0E0            |
| membrane fraction                               | Cellular Component | 7            | 9.1E-2         | 1.0E0            |
| cell fraction                                   | Cellular Component | 8            | 9.2E-2         | 1.0E0            |
| genitalia development                           | Biological Process | 2            | 9.3E-2         | 1.0E0            |
| regulation of hormone levels                    | Biological Process | 3            | 9.5E-2         | 1.0E0            |

**Supplementary Table 12. GO-based enrichment analysis of 457 proteins not detected in any of the three cell lines. Related to Figure 7.** The top results sorted by enrichment p-value are reported as well as the Benjamini-Hochberg multiple-testing correction and gene count for each GO term.

| GO Term                                              | GO Category        | Count | P-Value | Benjamini |
|------------------------------------------------------|--------------------|-------|---------|-----------|
| intrinsic to membrane                                | Cellular Component | 203   | 5.8E-10 | 1.9E-7    |
| integral to membrane                                 | Cellular Component | 198   | 7.1E-10 | 1.2E-7    |
| membrane part                                        | Cellular Component | 234   | 4.9E-9  | 5.5E-7    |
| membrane                                             | Cellular Component | 252   | 1.4E-7  | 1.2E-5    |
| calcium ion binding                                  | Molecular Function | 49    | 2.2E-4  | 1.4E-1    |
| extracellular region                                 | Cellular Component | 69    | 1.4E-3  | 8.8E-2    |
| growth factor activity                               | Molecular Function | 10    | 5.6E-3  | 8.4E-1    |
| transmembrane receptor activity                      | Molecular Function | 36    | 5.7E-3  | 7.1E-1    |
| digestive system process                             | Biological Process | 6     | 6.8E-3  | 1.0E0     |
| digestion                                            | Biological Process | 8     | 1.0E-2  | 1.0E0     |
| calcium ion transport                                | Biological Process | 9     | 1.1E-2  | 1.0E0     |
| plasma membrane                                      | Cellular Component | 127   | 1.4E-2  | 5.4E-1    |
| G-protein coupled receptor activity                  | Molecular Function | 19    | 1.6E-2  | 9.3E-1    |
| extracellular matrix                                 | Cellular Component | 18    | 1.6E-2  | 5.4E-1    |
| receptor activity                                    | Molecular Function | 52    | 1.6E-2  | 8.9E-1    |
| extracellular region part                            | Cellular Component | 38    | 1.7E-2  | 5.1E-1    |
| ion channel activity                                 | Molecular Function | 16    | 2.0E-2  | 8.9E-1    |
| endoplasmic reticulum                                | Cellular Component | 44    | 2.1E-2  | 5.4E-1    |
| intestinal absorption                                | Biological Process | 4     | 2.1E-2  | 1.0E0     |
| G-protein coupled receptor protein signaling pathway | Biological Process | 24    | 2.3E-2  | 1.0E0     |
| substrate specific channel activity                  | Molecular Function | 16    | 2.8E-2  | 9.3E-1    |
| homophilic cell adhesion                             | Biological Process | 10    | 2.8E-2  | 1.0E0     |
| proteinaceous extracellular matrix                   | Cellular Component | 16    | 2.9E-2  | 6.3E-1    |
| synapse                                              | Cellular Component | 17    | 3.0E-2  | 6.0E-1    |
| ion transmembrane transporter activity               | Molecular Function | 25    | 3.5E-2  | 9.4E-1    |
| low-density lipoprotein binding                      | Molecular Function | 4     | 3.5E-2  | 9.3E-1    |
| calcium ion transmembrane transporter activity       | Molecular Function | 3     | 3.5E-2  | 9.1E-1    |
| cation transmembrane transporter activity            | Molecular Function | 21    | 3.6E-2  | 8.9E-1    |
| molecular transducer activity                        | Molecular Function | 65    | 3.6E-2  | 8.7E-1    |
